# Supplementary material for: Spheroid size influences cellular senescence and angiogenic potential of mesenchymal stromal cell-derived soluble factors and extracellular vesicles
Source: PubMed Central journal article supplement (PMC10756914; doi:10.3389/fbioe.2023.1297644), 2023-12-12
Supplement: DataSheet1.pdf [file DataSheet1.pdf]

## *Supplementary Material*

# **Spheroid size influence cellular senescence and angiogenic potential of mesenchymal stromal cells derived soluble factors and extracellular vesicles**

Rovere M<sup>1</sup>, Reverberi D<sup>2</sup>, Pietro Arnaldi<sup>1</sup>, Palamà M.E.F<sup>1</sup>, Gentili C<sup>1\*</sup>

\* **Correspondence:** Chiara Gentili: chiara.gentili@unige.it

## **1 Supplementary materials**

### **1.1 Osteogenic differentiation**

To test osteogenic differentiation, 2D cells were seeded in 24-well plates at a density of  $10^5$  cells/cm<sup>2</sup> while spheroids were formed as explained in paragraph 2.2 of the manuscript. MSC were cultured in the presence of osteogenic induction medium containing 5 µg/mL ascorbic acid,  $10^{-7}$  mol/L dexamethasone and 10 mmol/L β glycerophosphate (all from Sigma-Aldrich, St. Louis, MO, USA). A 2D control was maintained in complete medium as negative control. After 3 weeks of culture, RNA from the different conditions were extracted and a quantitative real-time polymerase chain reaction was performed to evaluate the expression of *RUNX2*, *ALP*, *OCN*, *COL1A*, *Osterix* (for more detail of the RNA extraction and qRT-PCR protocol see paragraph 2.7 on the manuscript).

## 2 Supplementary Figures

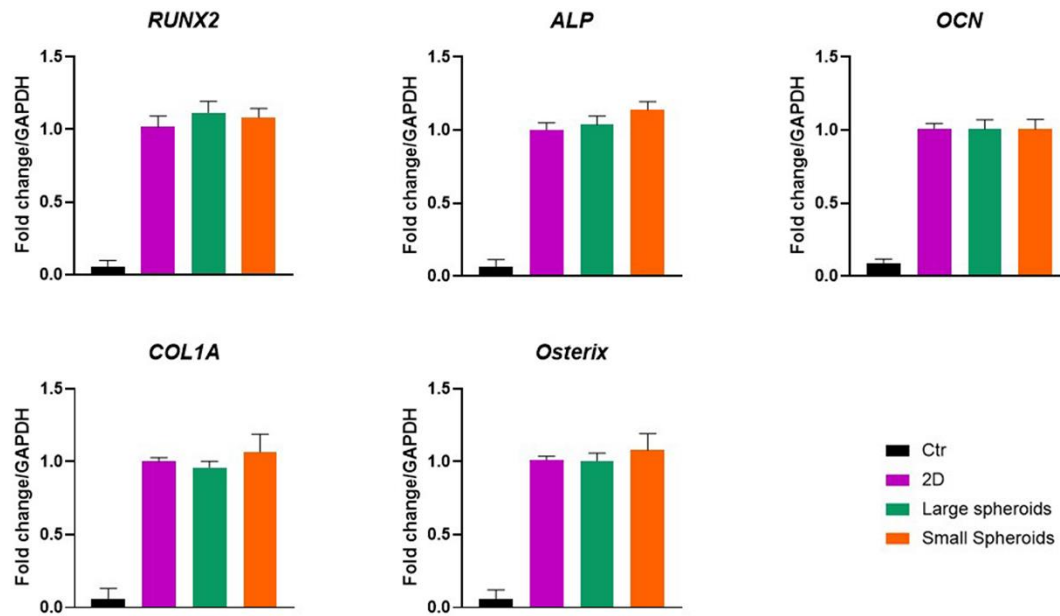

**Supplementary Figure 1. Osteogenic differentiation of MSC spheroids.** Quantitative Real Time PCR for the expression of *RUNX2*: RUNX family transcription factor 2, *ALP*: alkaline phosphatase, *OCN*: osteocalcin, *COL1A*: collagen type 1 alpha, *Osterix*, data are represented as mean  $\pm$  SD. (N=3, One-way Anova).

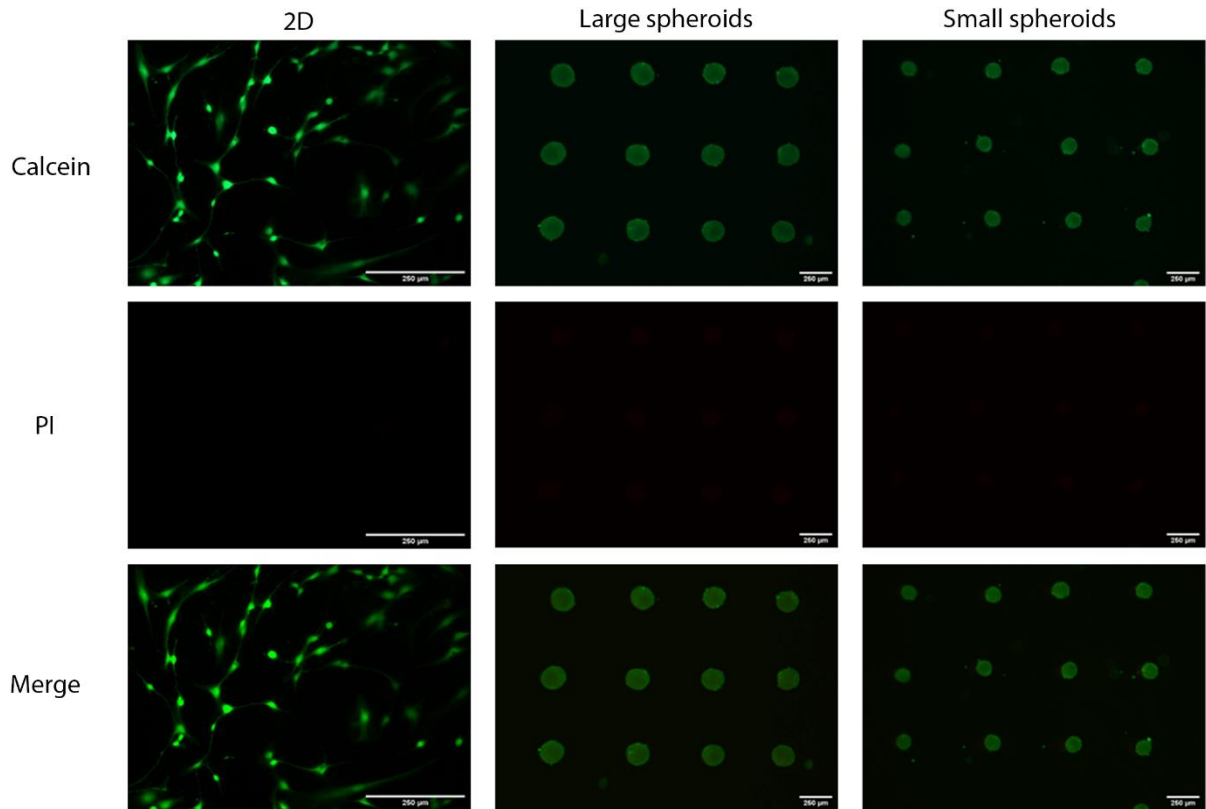

**Supplementary Figure 2. LIVE/DEAD viability assay.** Representative images of LIVE/DEAD viability assay on different culture conditions. From the top pictures show live cells (calcein), dead cells (PI) and merge (N=3), scalebar = 250 µm.

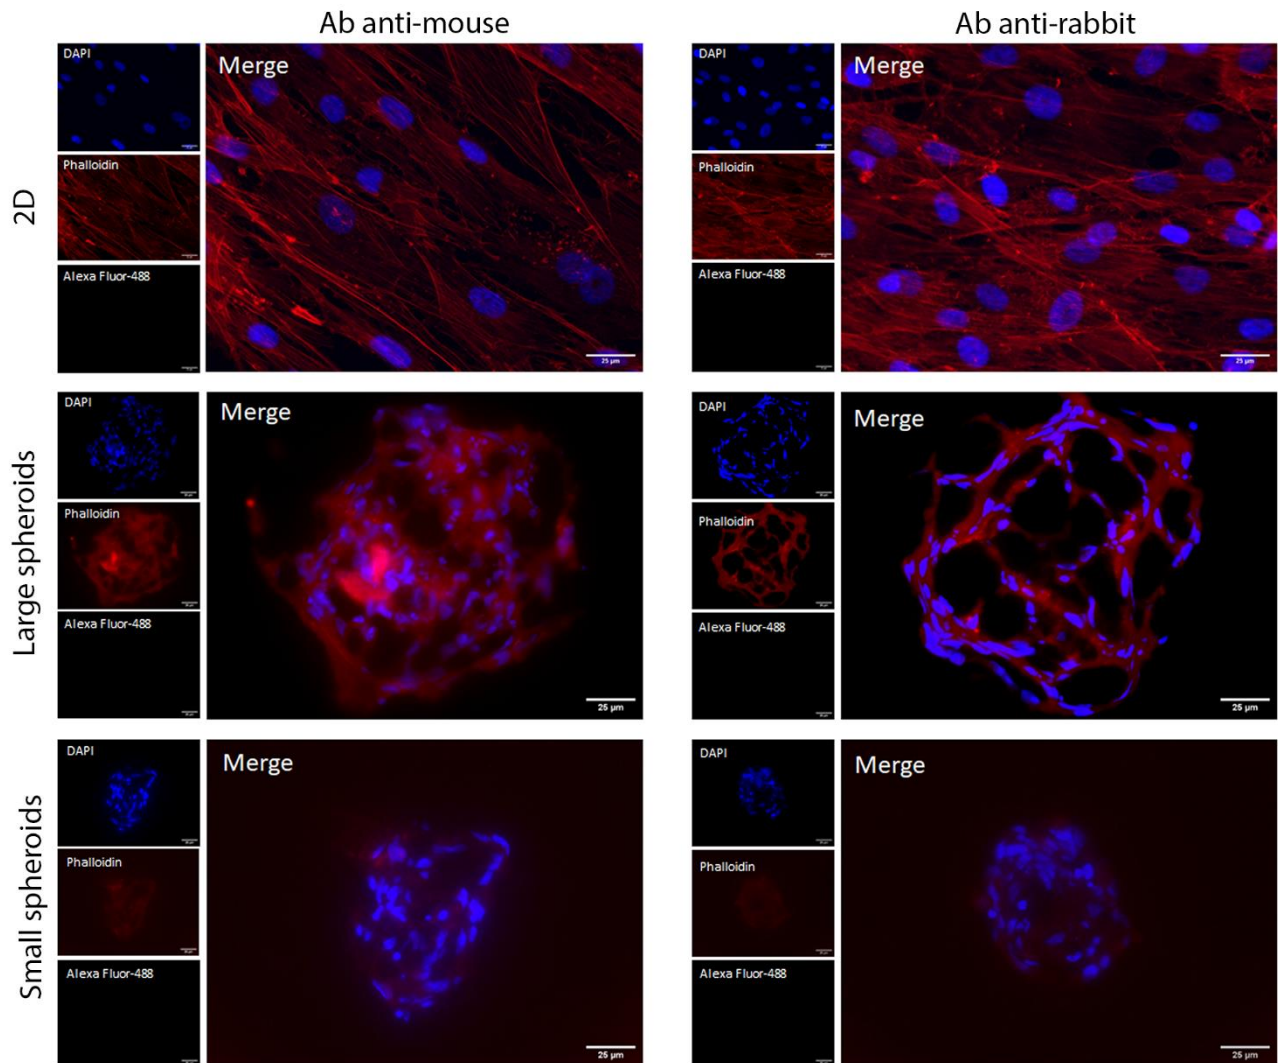

**Supplementary Figure 3. Non-specific binding of secondary antibody in immunofluorescence staining assessment.** Representative images of control for aspecific binding of secondary antibody used in immunostaining. From the top images show nuclei (DAPI), Phalloidin, secondary antibody aspecific binding (Alexa fluor-488) and merge, scalebar = 25 μm.

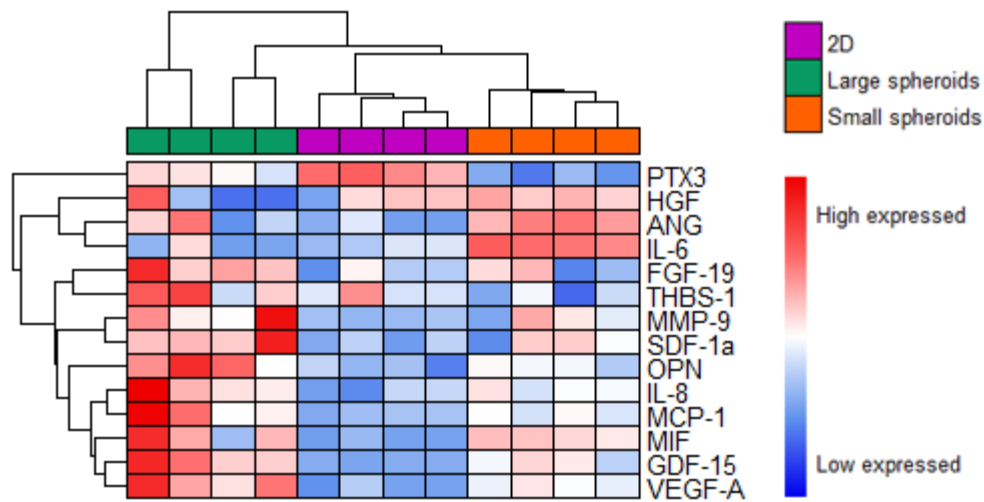

**Supplementary Figure 4. Proteome profiling analysis of MSCs secretome.** Heatmap of modulated proteins on cytokine array of CM derived from 2D, Big and Large spheroids culture of MSCs. Color code identify normalized pixel intensity (N=4). ANG: Angiogenin, FGF-19: Fibroblast Growth Factor 19, GDF-15: Growth Differentiation Factor 15, IL-6: Interleukin 6, IL-8: Interleukin 8, MCP-1: Monocyte Chemoattractant protein 1, MIF: Macrophage Migration Inhibitory Factor, MMP-9: Matrix Metalloproteinase 9, OPN: Osteopontin, PTX3: Pentraxin 3, SDF1a: Stromal Cell-derived factor 1, THBS-1: Thrombospondin 1, VEGF-A: Vascular Endothelial Growth factor-A, HGF: Hepatocyte Growth Factor.

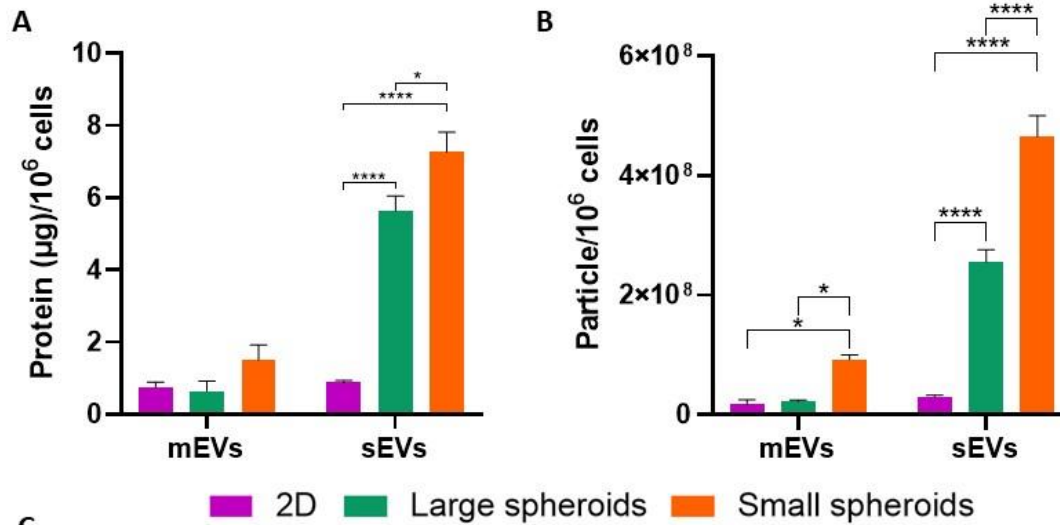

**Supplementary figure 5. BCA and NTA characterization of EVs isolated after 120 hours of culture.** (A) Quantification of protein content on mEVs and sEVs by BCA assay, data are normalized on cells number ( $\mu\text{g}/10^6$  cells). Data are represented as mean  $\pm$  SD, \* p-value  $< 0.05$ , \*\*\*\* p-value  $< 0.0001$  (N=3, Two-way Anova and Tukey multiple comparison). (B) NTA of particle concentration, expressed as particle/ $10^6$  cells. Data are represented as mean  $\pm$  SD, \* p-value  $< 0.05$ , \*\*\*\* p-value  $< 0.0001$  (N=3, Two-way Anova and Tukey multiple comparison). (C) Table show NTA analysis of size of mEVs and sEVs isolated from 2D, Large and Small spheroids. Data are reported as mean  $\pm$  SD (N=3).

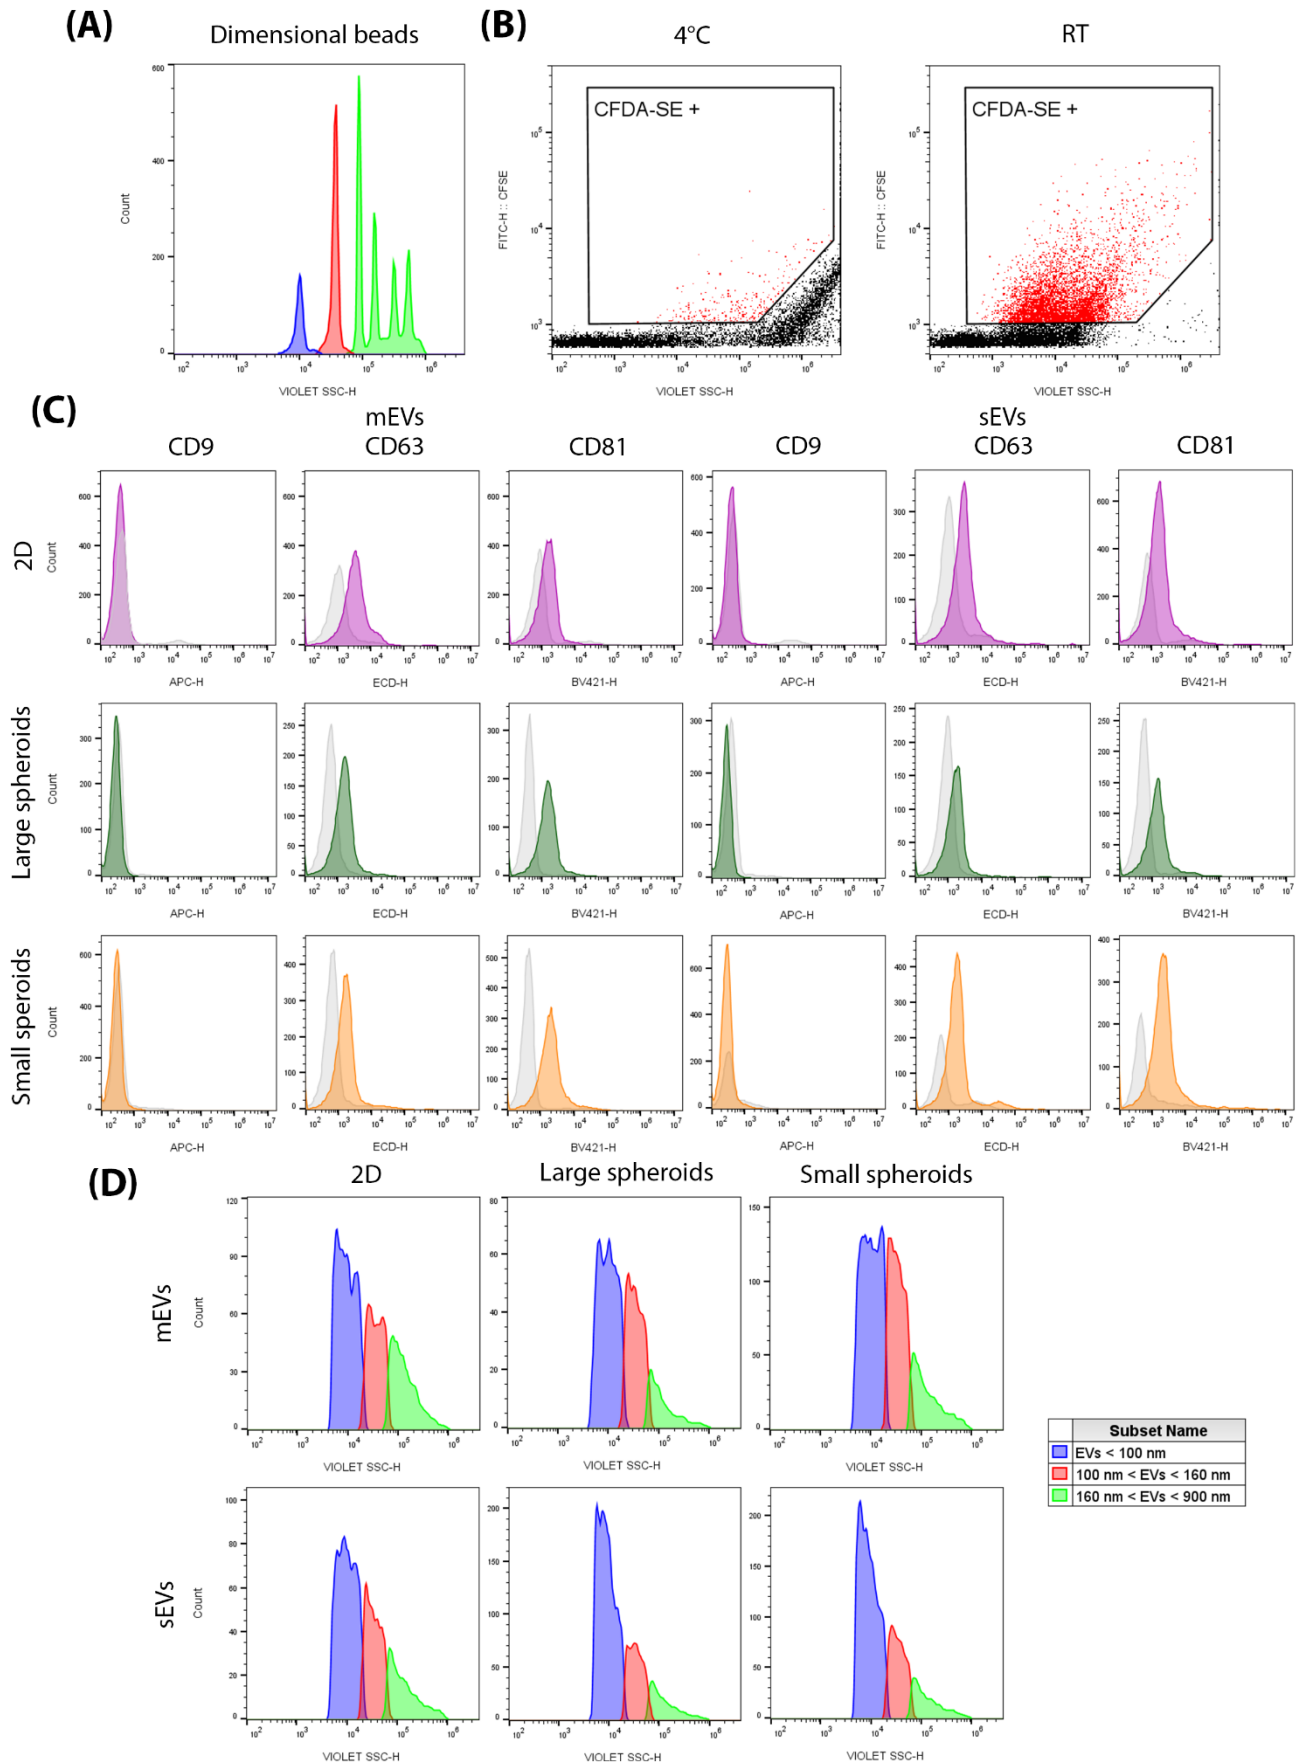

**Supplementary Figure 6. Non-conventional flow-cytometry analysis for EVs characterization.** (A) Representative histogram of fluorescent beads. (B) Representative CFDA-SE staining used to identify intact vesicles. EVs were stained with CFDA-SE at 4°C as control (left) to define the appropriate dimensional gate considering the EVs stained with CFDA-SE at room temperature (right). Red areas identify CFDA-SE positive events. (C) Representative histograms reporting flow cytometry analysis of MSCs cultured in 2D (purple), Large (green) or Small (orange) spheroids. Histogram curves identify cells reacting with CD9, CD63, CD81 specific antibodies. Area under the gray curve identify the reaction of the cells with the correspondent non-reactive immunoglobulin of the same isotype (isotype control). Data are representative of three independent experiments. (D) Size distribution analysis of EVs, for the analysis were defined three dimensional gates with dimensional beads: EVs < 100 nm (blue), 100 nm < EVs < 160 nm (red) and 160 nm < EVs < 900 nm (green), used to identify the percentage of the different subtypes of EVs present in each gate. Presented data are from one representative experiment.



### 3 Supplementary tables

**Supplementary table 1** Primer used for quantitative real-time PCR for osteogenic differentiation.

| Gene           | Forward primer                  | Reverse primer                 |
|----------------|---------------------------------|--------------------------------|
| <i>GAPDH</i>   | 5'-CCATCTTCCAGGAGCGAGAT-3'      | 5'- CTGCTTCACCACCTTCTTGAT-3'   |
| <i>RUNX2</i>   | 5'-ATGAGAGTAGGTGTCCCGCC-3'      | 5'- GGGGTGGTAGAGTGGATGGA -3'   |
| <i>ALP</i>     | 5'- GTATGAGAGTGACGAGAAAGCC-3'   | 5'-GTTCCAGATGAAGTGGGAGTG-3'    |
| <i>OCN</i>     | 5'-TTCTTTCTCTTCCCCTTG-3'        | 5'-CCTCTTCTGGAGTTTATTTGG-3'    |
| <i>COL1A</i>   | 5'-AGGGCTCCAACGAGATCGAGATCCG-3' | 5'-TACAGGAAGCAGACAGGGCCAACG-3' |
| <i>Osterix</i> | 5'-TGGGCTCCCAACACTATTTC-3'      | 5'-GGGAAGACTGAAGCCTGGA-3'      |

**Supplementary table 2. Spheroids size variation during culture time.** Table report size variation of Large and Small spheroids during culture time. Diameter was calculated on 100 spheroids for each time-point and for each replicate, by using ImageJ. Data are represented as mean  $\pm$  SD (N=3).

|                        | 24 h                       | 48 h                       | 72 h                       | 96 h                       | 120 h                      | 144 h                      | 168 h                      | 192 h                      |
|------------------------|----------------------------|----------------------------|----------------------------|----------------------------|----------------------------|----------------------------|----------------------------|----------------------------|
| <b>Large spheroids</b> | 427.20 $\pm$ 30.42 $\mu$ m | 391.87 $\pm$ 21.62 $\mu$ m | 365.37 $\pm$ 27.67 $\mu$ m | 339.52 $\pm$ 19.71 $\mu$ m | 288.64 $\pm$ 34.63 $\mu$ m | 295.63 $\pm$ 21.00 $\mu$ m | 284.96 $\pm$ 30.89 $\mu$ m | 285.22 $\pm$ 24.20 $\mu$ m |
| <b>Small spheroids</b> | 268.17 $\pm$ 15.16 $\mu$ m | 218.69 $\pm$ 12.76 $\mu$ m | 198.95 $\pm$ 16.86 $\mu$ m | 194.29 $\pm$ 20.78 $\mu$ m | 209.33 $\pm$ 20.05 $\mu$ m | 203.5 $\pm$ 18.52 $\mu$ m  | 209.33 $\pm$ 18.76 $\mu$ m | 206.23 $\pm$ 17.15 $\mu$ m |

**Supplementary table 3. Spheroids cell number analysis.** Table report the number of cell composing the spheroids after 72 hours of culture calculated after digestion of the aggregate. Data are represented as mean  $\pm$  SD (N=3).

|                             | Large spheroids | Small spheroids |
|-----------------------------|-----------------|-----------------|
| <b>Spheroid cell number</b> | 2592 $\pm$ 125  | 1032 $\pm$ 174  |
